# Supplementary material for: Neoadjuvant Enzalutamide Prior to Prostatectomy
Source: Oxford University Press journal article supplement (doi:10.1158/1078-0432.ccr-16-1357), 2016-11-10
Supplement: 10780432ccr161357-sup-167052_1_supp_3672272_jdrf4s.docx [file 10780432ccr161357-sup-167052_1_supp_3672272_jdrf4s.docx]

**Supplementary Data**

**Figure S4.** Correlation of immunohistochemical expression of the glucocorticoid receptor (GR) after enza or enza/dut/LHRHa with residual cancer burden (RCB). A tissue microarray comprising cores of cancer tissue from each patient was analyzed for RCB and nuclear expression of GR expressed as total proportion of GR-positive tumor nuclei in (A) enza-treated and (B) enza/dut/LHRHa-treated patients. *P* values were calculated using the nonparametric Mann-Whitney test.

**
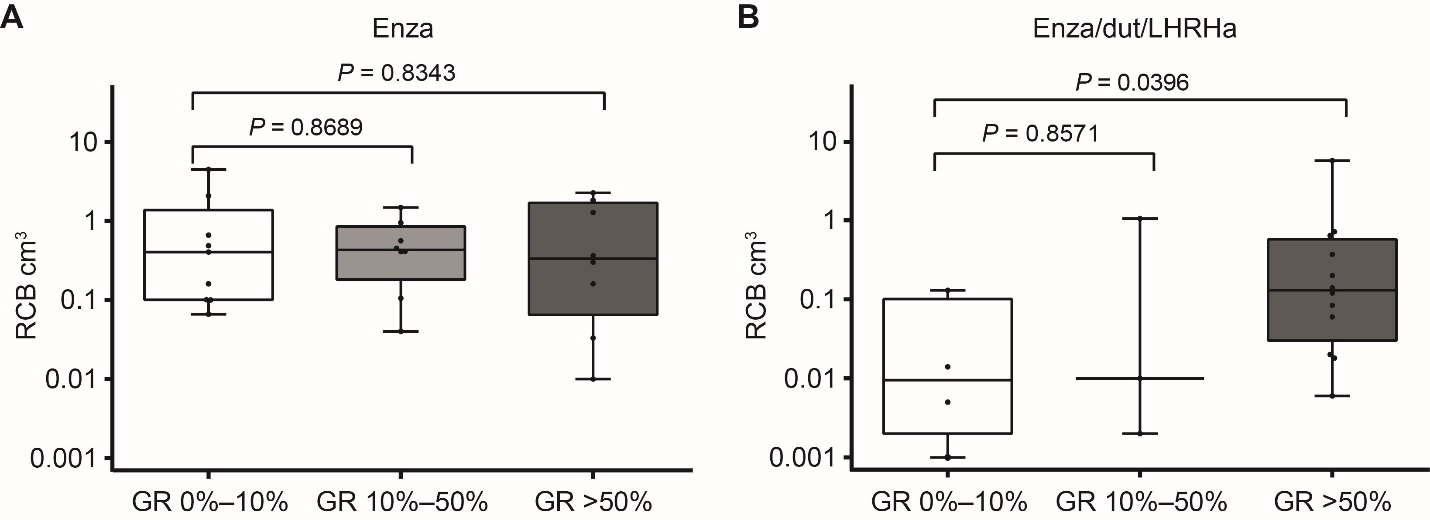
**

Dut, dutasteride; enza, enzalutamide; LHRHa, luteinizing hormone-releasing hormone analog (leuprolide).
